## Title

The *International Classification of Diseases, 10<sup>th</sup> Edition, Clinical Modification (ICD-10-CM)* Code I16.0 Accurately Identifies Patients with Hypertensive Urgency

## Short Title

Validating the Hypertensive Urgency *ICD-10-CM* Code

## Authors

Jed Kaiser, BS<sup>1</sup>\*; Vanessa Liao, BS<sup>1</sup>\*; Hooman Kamel, MD MS<sup>1</sup>; Catherine Ng, BA<sup>2</sup>; Richard I. Lappin, MD PhD<sup>3</sup>; Ava L. Liberman, MD<sup>1</sup>

## Affiliations

<sup>1</sup>Clinical and Translational Neuroscience Unit, Department of Neurology and Feil Family Brain and Mind Research Institute, Weill Cornell Medicine

<sup>2</sup>Information Technologies & Services Department, Weill Cornell Medicine, New York

<sup>3</sup>Department of Emergency Medicine, Weill Cornell Medicine

\*Co-first Authors

## Correspondence to:

Ava L. Liberman, MD  
Weill Cornell Medicine  
420 East 70<sup>th</sup> Street  
New York, NY 10021  
Phone: 212-746-0225  
Fax: 646-962-0126  
all9188@med.cornell.edu

Key words: Hypertensive Urgency, Emergency Medicine, ICD-10-CM, validation

## Character Count/Word Count/Number of:

Title: 18

Abstract: 249

Tables: 2

Figures: 0

Text: 1288

References: 15

## ABSTRACT

### Objective

Hypertensive urgency, defined as acutely elevated BP without target organ damage, is associated with an increased risk of adverse cardiovascular events and accounts for a substantial proportion of national emergency department (ED) visits. To advance research in this space, we sought to validate the new *ICD-10-CM* diagnostic code for hypertensive urgency within a single healthcare system.

### Methods

We performed a retrospective chart-review study of ED encounters at Weill Cornell Medicine from 2016 – 2021. We randomly selected 25 encounters with the *ICD-10-CM* code I16.0 as the primary discharge diagnosis and 25 encounters with primary *ICD-10-CM* discharge diagnosis codes for benign headache disorders. A single board-certified vascular neurologist reviewed all 50 encounters while blinded to the assigned *ICD-10-CM* codes to identify cases of hypertensive urgency. We calculated the sensitivity, specificity, and positive predictive values of the *ICD-10-CM* code I16.0 with 95% confidence intervals (CI).

### Results

Out of 50 randomly selected ED encounters, 24 were adjudicated as hypertensive urgency. All encounters adjudicated as hypertensive urgency had been assigned the *ICD-10-CM* discharge diagnosis code of I16.0. All 25 of the encounters adjudicated as headache were assigned an *ICD-10-CM* discharge diagnosis code for a benign headache disorder. The *ICD-10-CM* code for hypertensive urgency, I16.0, was thus found to have a sensitivity of 100% (95% CI: 86-100%), specificity of 96% (95% CI: 80-100%), and positive predictive value of 96% (95% CI: 78-99%).

### Conclusion

We found that the new *ICD-10-CM* code for hypertensive urgency, I16.0, can reliably identify patients with this condition.

## Introduction

Uncontrolled hypertension is a leading cause of cardiovascular disease and premature death worldwide.<sup>1</sup> The prevalence of hypertension in the US is substantial with nearly half of all adults (47% or 116 million people) diagnosed with hypertension.<sup>2</sup> Recent studies have noted that blood pressure (BP) control among hypertensive adults has decreased in recent years.<sup>3</sup> Unsurprisingly, the national proportion of emergency department (ED) visits for hypertensive crises has increased steadily.<sup>4,5</sup> An estimated 40.4 million patients seen between 2016-2019 in US EDs had severe hypertension, equating to 6.1% (95% CI: 5.7-6.5%) of all ED visits.<sup>6</sup>

Health services researchers interested in acutely hypertensive patients have mainly focused on instances where hypertension results in target-organ damage rather than hypertensive urgency, defined as acutely elevated BP without immediately apparent target organ damage, despite the fact that the latter is associated with substantial future cardiovascular risk.<sup>7</sup> One reason for this research discrepancy may be that, unlike hypertensive patients with target-organ damage,<sup>8</sup> identifying hypertensive urgency patients using administrative claims data has been challenging as, until recently, there were no diagnostic codes for this condition. With the adoption of the *International Classification of Diseases and Related Health Problems, 10<sup>th</sup> Edition-Clinical Modifications (ICD-10-CM)* in the US in 2015, a diagnostic code specifically for hypertensive urgency, I16.0, was introduced. To advance acute hypertension research we herein seek to determine the validity of the new *ICD-10-CM* for hypertensive urgency; we are not aware of any prior studies evaluating this diagnostic code.

## Methods

### *Design and Setting*

We conducted a retrospective study of ED encounters at the two sites of a single hospital center, Weill Cornell Medicine (WCM), from 1/1/2016 to 12/1/2021. One study site is a community-based 27-bed adult ED whereas the other is a 50-bed ED that is part of a tertiary referral center. Both study sites are located in New York City, New York.

### *Study Population*

To validate the new *ICD-10-CM* code for hypertensive urgency, we identified ED encounters with the code I16.0 as the primary discharge diagnosis. As a comparator, we also identified encounters with a primary *ICD-10-CM* discharge diagnosis code for a benign headache disorder: G43-G43.5x, G43.7x-G43.9x, G43.A-G43.D, G44, or R51. These diagnostic codes for headache have been previously used in administrative claims research.<sup>9</sup> We selected patients with a primary headache disorder as a comparator since headache complaints are very common in patients with severely elevated blood pressure<sup>6</sup> and patients with headache complaints often have elevated blood pressure.<sup>10</sup> For this study, we only included ED encounters that resulted in discharge to home (ED treat-and-release visit). To identify relevant encounters, we leveraged our existing institutional infrastructure for secondary use of data from the existing electronic health record (EHR).<sup>11</sup>

As in a prior *ICD* code validation study,<sup>12</sup> we randomly selected 25 encounters with a primary discharge diagnosis of I16.0 and 25 encounters with a primary discharge diagnosis of any of the aforementioned *ICD-10-CM* benign headache disorder codes. A single board-certified vascular neurologist (A.L.L.) reviewed detailed medical records of all 50 selected encounters while fully blinded to their assigned *ICD-10-CM* discharge diagnosis codes. Determination of hypertensive urgency was based on its standard definition as severely elevated BP without evidence of target organ damage; no specific BP measurement criteria were used during the adjudication process given the variable definition of severely elevated BP in extant literature as well as clinical practice.<sup>13,14</sup> Institutional review board approval was obtained for this study from the WCM Institutional Review Board which granted a waiver of informed consent in accordance with the Declaration of Helsinki (reference number = 22-12-071-380).

### *Statistical Analysis*

We used standard descriptive statistics, including medians with interquartile ranges (IQR), to describe all included encounters, abstracting pre-specified demographic and clinical variables from the EHR. We compared patients with an adjudicated diagnosis of headache versus hypertensive urgency using two-sided chi-squared test for dichotomized variables and Mann-Whitney U for continuous variables. Using the adjudicated diagnosis based on detailed medical record review as the gold standard, we calculated the sensitivity, specificity, and positive predictive value with 95% confidence intervals (CI) of *ICD-10-CM* code I16.0. We considered  $P < 0.05$  to be statistically significant. Analyses were performed using Stata/MP, version 15.1 (StataCorp, TX).

## **Results**

Of the 50 selected ED encounters, blinded adjudication using the EHR resulted in a clinical diagnosis of hypertensive urgency for 24 encounters and a benign headache disorder for 25 encounters. One encounter was adjudicated as a transient ischemic attack (TIA) and was included in the non-hypertensive urgency category for our analyses. The median age of the entire cohort was 59 years (IQR: 50-69) and 62% were female.

Comparing patients with hypertensive urgency ( $n=24$ ) to those with a headache disorder ( $n=25$ ), those with hypertensive urgency were older (64 vs. 54 years of age;  $P = .04$ ), more likely to have a history of hypertension (83% vs. 28%;  $P < .001$ ), and less likely to have a history of a headache disorder prior to ED arrival (4% vs. 40%;  $P = .002$ ). Sex and race were similar between the two groups (Table 1).

A chief complaint of isolated headache was exclusively seen in patients with a primary headache disorder whereas patients with hypertensive urgency often had neurological and/or medical complaints that did not include headache. Among patients with hypertensive urgency, 95% had a measured BP  $>160/100$  mm Hg and 64% had a BP  $>180/110$  mm Hg during their ED visit. Patients with hypertensive urgency were more likely to have laboratory testing (83% vs. 48%;  $P < .01$ ) as well as an electrocardiogram (54% vs. 24%;  $P = .03$ ) obtained in the ED than headache patients. Head computed tomography and brain magnetic resonance imaging were obtained with similar frequency among included headache and hypertensive urgency patients (Table 1).

All 24 of the encounters adjudicated as hypertensive urgency had been assigned an *ICD-10-CM* discharge diagnosis of I16.0 and all 25 of the encounters adjudicated as headache were assigned an *ICD-10-CM* discharge diagnosis code for a benign headache disorder. The one encounter that was determined to be a TIA was assigned an *ICD-10-CM* code of I16.0. Thus, the *ICD-10-CM* code for hypertensive urgency, I16.0, had a sensitivity of 100% (95% CI: 86-100%), a specificity of 96% (95% CI: 80-100%), and positive predictive value of 96% (95% CI: 78-99%; Table 2).

## Discussion

In this retrospective cohort study, the new *ICD-10-CM* code for hypertensive urgency, I16.0, was found to be highly accurate. Based on our findings, this code can be used to identify patients with hypertensive urgency, particularly in the emergency setting, in future research using administrative claims data. The ability of the *ICD-10-CM* code for hypertensive urgency to identify patients with this condition is similar to that of other *ICD* codes for cardiovascular diseases.<sup>12,15</sup> For example, the *ICD* code for accurately identifying ED patients who suffered an out-of-hospital cardiac arrest was shown to have a specificity of 99%, sensitivity of 87%, and positive predictive value of 92%.<sup>15</sup>

The primary strength of this study is its use of blinded, expert adjudication to determine the validity of the new *ICD-10-CM* code as compared to patients with similar clinical characteristics. Important limitations include the fact that, since variable BP measurements are reported in the literature to define hypertensive urgency,<sup>13,14</sup> we relied on provider notes to adjudicate the diagnosis rather than BP measurements alone. However, our broad definition of hypertensive urgency as severely elevated blood pressure without target-organ damage is consistent with clinical practice and the majority of patients had BP >160/100 mm Hg. Additionally, since we only included encounters where patients were discharged to home from the ED in this study, so as not to bias case adjudication, additional research to determine the validity of the new hypertensive urgency code in the inpatient or outpatient setting may be warranted. Lastly, our results are from a single hospital center which limits the generalizability of our findings.

## Conclusion

We found that the *ICD-10-CM* code for hypertensive urgency, I16.0, had a sensitivity of 100%, specificity of 96%, and positive predictive value of 96% as compared to detailed chart review.

## **DECLARATIONS**

### **Ethics Approval and Consent to Participate**

Institutional review board approval was obtained for this study from the WCM Institutional Review Board which granted a waiver of informed consent.

### **Consent for Publication**

All authors have read and approved the submitted manuscript for publication.

### **Availability of Data and Materials**

All data generated or analyzed during this study are included in this published article.

### **Sources of Funding**

Dr. Liberman is supported by NINDS research grant K23NS10764.

### **Disclosures**

Dr. Kamel serves as a PI for the NIH-funded ARCADIA trial (NINDS U01NS095869), which receives in-kind study drug from the BMS-Pfizer Alliance for Eliquis® and ancillary study support from Roche Diagnostics; as Deputy Editor for *JAMA Neurology*; on clinical trial steering/executive committees for Medtronic, Janssen, and Javelin Medical; and on endpoint adjudication committees for AstraZeneca, Novo Nordisk, and Boehringer Ingelheim. He has an ownership interest in TETMedical, Inc.

## References

1. Mills KT, Stefanescu A, He J. The global epidemiology of hypertension. *Nat Rev Nephrol.* 2020;16:223-237
2. Centers for disease control and prevention. Hypertension cascade: Hypertension prevalence, treatment and control estimates among U.S. Adults aged 18 years and older applying the criteria from the american college of cardiology and american heart association's 2017 hypertension guideline—nhanes 2015–2018 *Atlanta, GA: U.S. Department of Health and Human Services.*
3. Muntner P, Hardy ST, Fine LJ, Jaeger BC, Wozniak G, Levitan EB, et al. Trends in blood pressure control among us adults with hypertension, 1999-2000 to 2017-2018. *Jama.* 2020;324:1190-1200
4. Janke AT, McNaughton CD, Brody AM, Welch RD, Levy PD. Trends in the incidence of hypertensive emergencies in us emergency departments from 2006 to 2013. *J Am Heart Assoc.* 2016;5
5. Karras DJ, Ufberg JW, Heilpern KL, Cienki JJ, Chiang WK, Wald MM, et al. Elevated blood pressure in urban emergency department patients. *Acad Emerg Med.* 2005;12:835-843
6. Liberman AL, Kamel H, Lappin R, Ishak A, Navi BB, Parikh NS, et al. Prevalence of neurological complaints among emergency department patients with severe hypertension. *American Journal of Emergency Medicine.* 2023;64:90-95
7. Vlcek M, Bur A, Woisetschläger C, Herkner H, Laggner AN, Hirschl MM. Association between hypertensive urgencies and subsequent cardiovascular events in patients with hypertension. *J Hypertens.* 2008;26:657-662
8. Kumar N, Simek S, Garg N, Vaduganathan M, Kaiksow F, Stein JH, et al. Thirty-day readmissions after hospitalization for hypertensive emergency. *Hypertension.* 2019;73:60-67
9. Liberman AL, Zhang C, Lipton RB, Kamel H, Parikh NS, Navi BB, et al. Short-term stroke risk after emergency department treat-and-release headache visit. *Headache: The Journal of Head and Face Pain.* 2022;62:1198-1206
10. Friedman BW, Mistry B, West JR, Wollowitz A. The association between headache and elevated blood pressure among patients presenting to an ed. *Am J Emerg Med.* 2014;32:976-981
11. Champion TR, Sholle ET, Pathak J, Johnson SB, Leonard JP, Cole CL. An architecture for research computing in health to support clinical and translational investigators with electronic patient data. *J Am Med Inform Assoc.* 2022;29:677-685
12. Mangla A, Navi BB, Layton K, Kamel H. Transient global amnesia and the risk of ischemic stroke. *Stroke.* 2014;45:389-393
13. Whelton PK, Carey RM, Aronow WS, Casey DE, Jr., Collins KJ, Dennison Himmelfarb C, et al. 2017 acc/aha/aapa/abc/acpm/ags/apha/ash/aspc/nma/pcna guideline for the prevention, detection, evaluation, and management of high blood pressure in adults: Executive summary: A report of the american college of cardiology/american heart association task force on clinical practice guidelines. *Hypertension.* 2018;71:1269-1324
14. Wolf SJ, Lo B, Shih RD, Smith MD, Fesmire FM. Clinical policy: Critical issues in the evaluation and management of adult patients in the emergency department with asymptomatic elevated blood pressure. *Ann Emerg Med.* 2013;62:59-68

15. Shelton SK, Chukwulebe SB, Gaieski DF, Abella BS, Carr BG, Perman SM. Validation of an icd code for accurately identifying emergency department patients who suffer an out-of-hospital cardiac arrest. *Resuscitation*. 2018;125:8-11

Table 1: Included encounters adjudicated as having an ED treat-and-release visit for headache or hypertensive urgency (N= 49)

|                                                              | Hypertensive urgency encounter (n=24) | Headache disorder encounter* (n= 25) | p-value |
|--------------------------------------------------------------|---------------------------------------|--------------------------------------|---------|
| <i>Demographics</i>                                          |                                       |                                      |         |
| Median Age (IQR)                                             | 64 [52-72 ]                           | 54 [44-62]                           | 0.04    |
| Female Sex                                                   | 14 (58.3%)                            | 16 (64%)                             | 0.68    |
| Race                                                         |                                       |                                      |         |
| - Black                                                      | 9 (37.5%)                             | 8 (32%)                              | 0.97    |
| - White                                                      | 5 (20.8%)                             | 5 (20%)                              |         |
| - Other                                                      | 8 (33.3%)                             | 10 (40%)                             |         |
| Declined                                                     | 2 (8.3%)                              | 2 (8%)                               |         |
| <i>Past Medical History</i>                                  |                                       |                                      |         |
| Hypertension                                                 | 20 (83%)                              | 7 (28%)                              | <0.001  |
| Diabetes                                                     | 4 (16%)                               | 1 (4%)                               | 0.13    |
| Prior Stroke                                                 | 2 (8.3%)                              | 2 (8%)                               | 0.97    |
| Coronary artery disease                                      | 2 (8.3%)                              | 0 (0%)                               | 0.16    |
| Primary headache disorder                                    | 1 (4%)                                | 10 (40%)                             | 0.002   |
| Psychiatric Illness                                          | 2 (8.3%)                              | 7 (28%)                              | 0.08    |
| Substance Abuse                                              | 1 (4%)                                | 5 (20%)                              | 0.09    |
| <i>ED Course</i>                                             |                                       |                                      |         |
| <i>Chief Complaint</i>                                       |                                       |                                      |         |
| - Isolated headache                                          | 0                                     | 7                                    | 0.004   |
| - Headache with additional medical or neurological complaint | 10                                    | 14                                   |         |
| - Medical or neurological complaint without headache         | 12                                    | 3                                    |         |
| - Other                                                      | 2                                     | 1                                    |         |
| BP >160/100 mm Hg at any point in the ED                     | 23 (95%)                              | 6 (24%)                              | <0.001  |
| BP > 180/110 mm Hg at any point in the ED                    | 16 (64%)                              | 1 (4%)                               | <0.001  |
| Any consultation                                             | 5 (20.8%)                             | 3 (12%)                              | 0.48    |

|                                           |          |          |       |
|-------------------------------------------|----------|----------|-------|
| obtained                                  |          |          |       |
| Any laboratory data obtained              | 20 (83%) | 12 (48%) | <0.01 |
| Electrocardiogram obtained                | 13 (54%) | 6 (24%)  | 0.03  |
| Head computed tomography obtained         | 11 (45%) | 12 (48%) | 0.88  |
| Brain magnetic resonance imaging obtained | 2 (8.3%) | 2 (8%)   | 1.0   |

\*A single patient had 5 visits included in our sample, all of these visits were adjudicated as headache

Table 2. Hypertensive Urgency *ICD-10-CM* Code Validation

|                                            |                | Adjudicated as encounter for hypertensive urgency after detailed chart review |               |
|--------------------------------------------|----------------|-------------------------------------------------------------------------------|---------------|
|                                            |                | <i>Yes</i>                                                                    | <i>No</i>     |
| Hypertensive urgency <i>ICD-10-CM</i> code | <i>Present</i> | 24 encounters                                                                 | 1 encounter   |
|                                            | <i>Absent</i>  | 0                                                                             | 25 encounters |
